# Supplementary material for: Prognosis Following Surgery for Recurrent Ovarian Cancer and Diagnostic Criteria Predictive of Cytoreduction Success: A Systematic Review and Meta-Analysis
Source: MDPI journal article supplement (doi:10.3390/diagnostics13223484), 2023-11-20

**Supplementary Figure S1. PRISMA flow diagram for study selection**

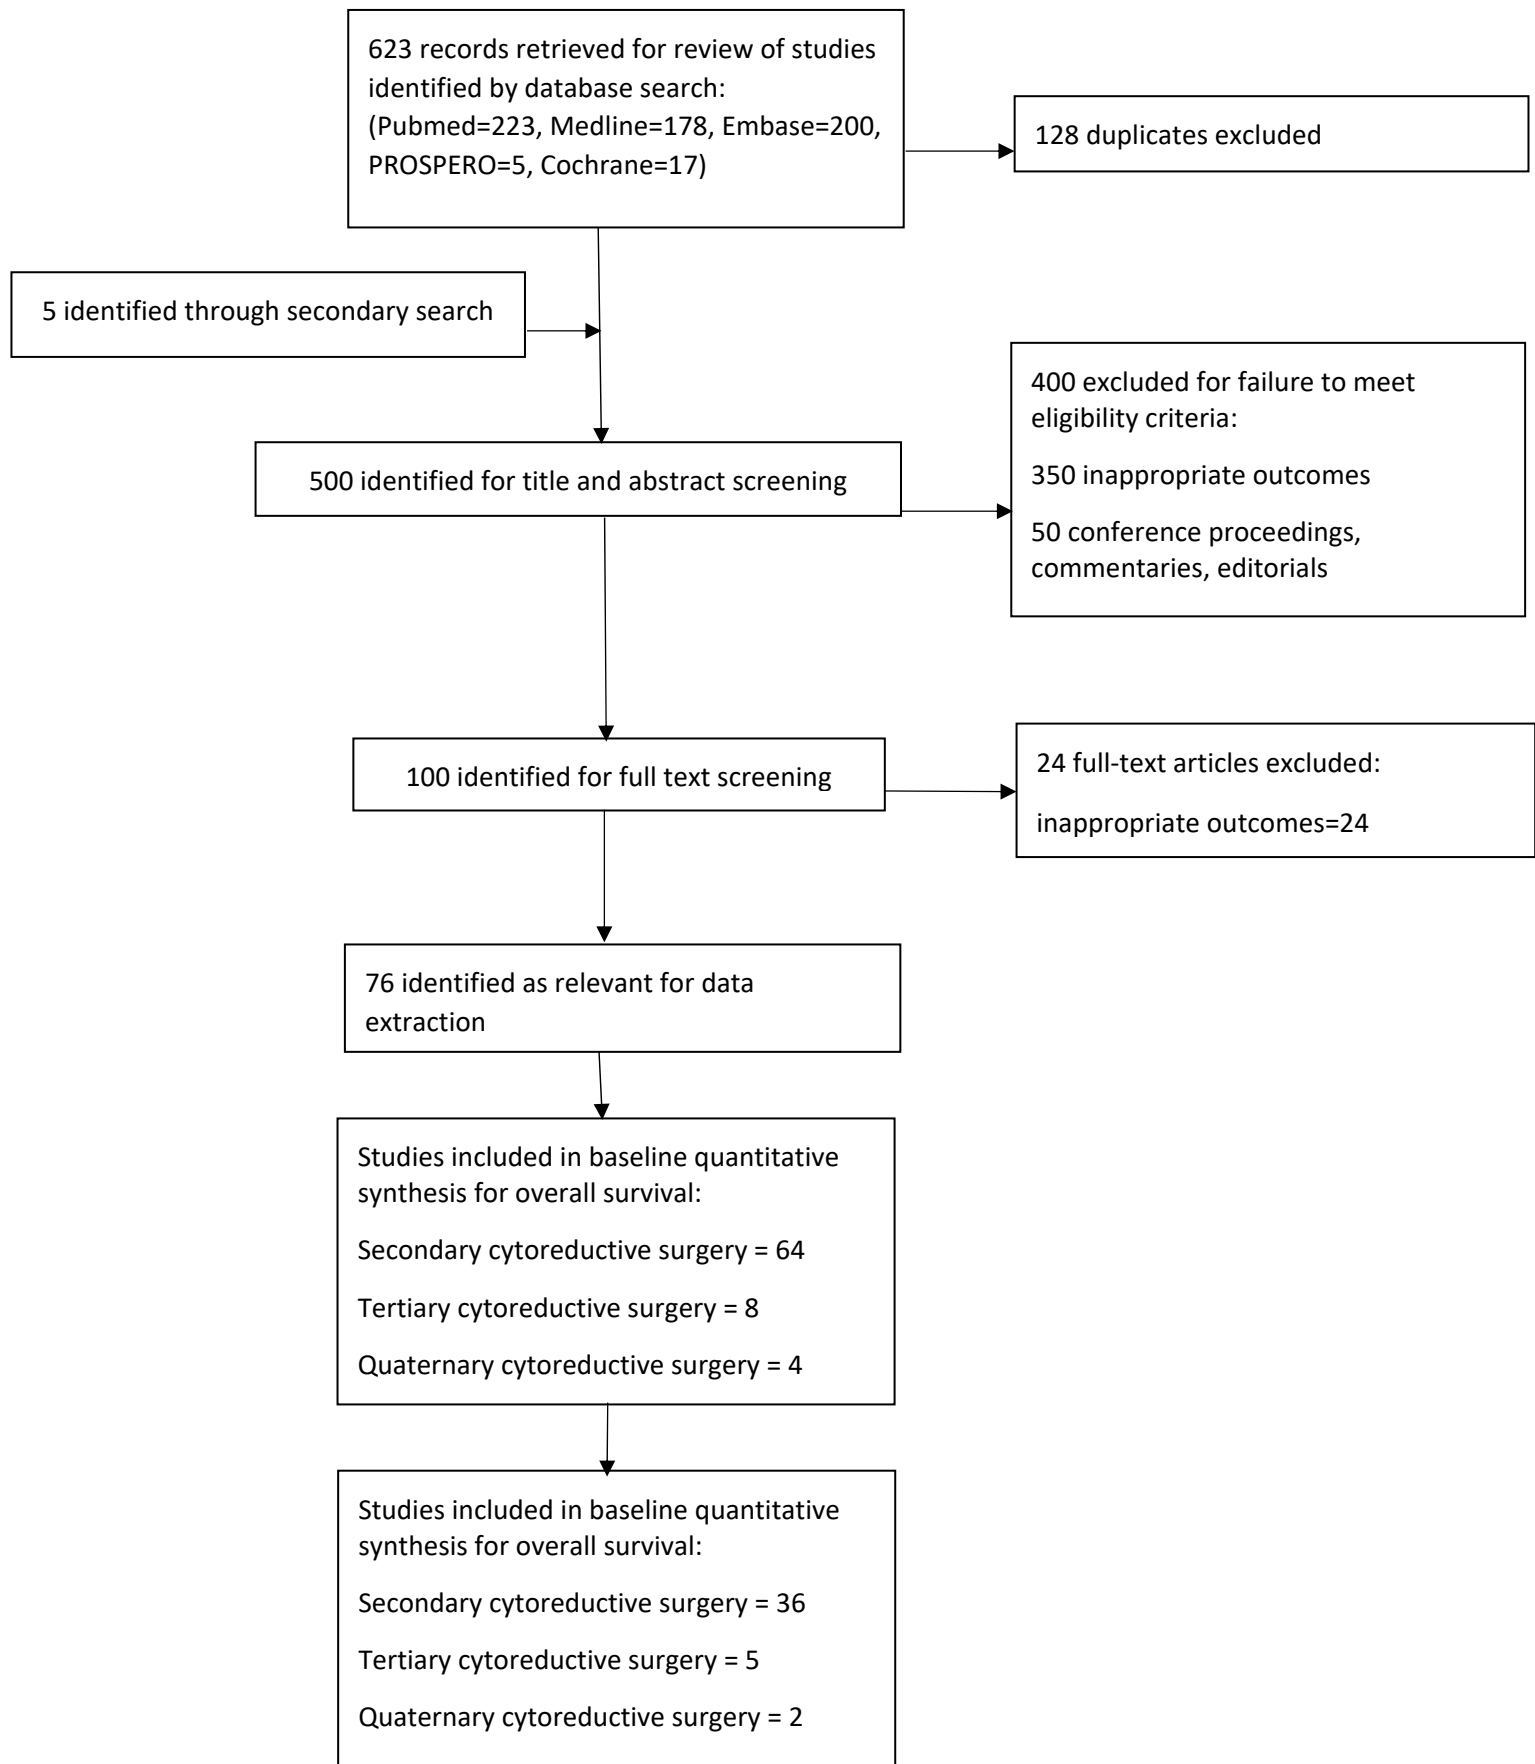

Supplementary Figure S2. Funnel plot of secondary cytoreduction studies for publication bias

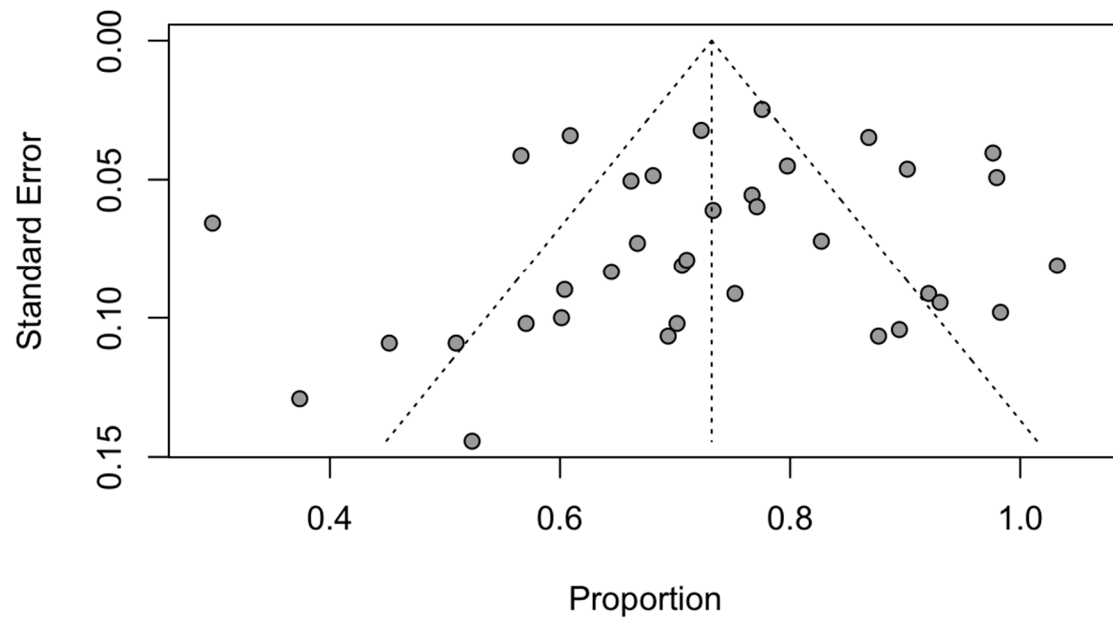

Supplement: s1 [file s1]
