# Supplementary material for: Prognosis Following Surgery for Recurrent Ovarian Cancer and Diagnostic Criteria Predictive of Cytoreduction Success: A Systematic Review and Meta-Analysis
Source: MDPI journal article supplement (doi:10.3390/diagnostics13223484), 2023-11-20
Supplement: s1 [file s1]

**Supplementary Table S1. Search strategy for literature review**

|                                               |                                                                                                                                                                                                                                                                                                  |
|-----------------------------------------------|--------------------------------------------------------------------------------------------------------------------------------------------------------------------------------------------------------------------------------------------------------------------------------------------------|
| <b>Eligibility criteria</b>                   | Participants: Platinum sensitive epithelial ovarian cancer recurrence<br>Intervention: Recurrent cytoreduction surgery<br>Comparison: No surgery<br>Outcomes: death rate, overall survival, cytoreduction rates, post operative morbidity & mortality                                            |
| <b>Data sources</b>                           | MEDLINE (1946 to 2023), EMBASE (1974 to 2023), Pubmed (1996 to 2023), PROSPERO (2011 to 2023), Cochrane (1999 to 2023), citation searching, specialist journals, grey literature (conference proceedings/Google search), clinical trial registries (ISRCTN registry/ClinicalTrials.gov registry) |
| <b>Search strategy for database searching</b> |                                                                                                                                                                                                                                                                                                  |
| 1.                                            | (OVARIAN CANCER).ti,ab                                                                                                                                                                                                                                                                           |
| 2.                                            | exp "OVARIAN CANCER"/                                                                                                                                                                                                                                                                            |
| 3.                                            | 1 OR 2                                                                                                                                                                                                                                                                                           |
| 4.                                            | (RECURRENCE).ti,ab                                                                                                                                                                                                                                                                               |
| 5.                                            | exp "RECURRENCE"/                                                                                                                                                                                                                                                                                |
| 6.                                            | 4 OR 5                                                                                                                                                                                                                                                                                           |
| 7.                                            | (SURGERY).ti,ab                                                                                                                                                                                                                                                                                  |
| 8.                                            | exp "SURGERY"/                                                                                                                                                                                                                                                                                   |
| 9.                                            | 7 OR 8                                                                                                                                                                                                                                                                                           |
| 10.                                           | (DEATH).ti,ab                                                                                                                                                                                                                                                                                    |
| 11.                                           | exp "DEATH"/                                                                                                                                                                                                                                                                                     |
| 12.                                           | 10 OR 11                                                                                                                                                                                                                                                                                         |
| 13.                                           | (SURVIVAL).ti,ab                                                                                                                                                                                                                                                                                 |
| 14.                                           | exp "SURVIVAL"/                                                                                                                                                                                                                                                                                  |
| 15.                                           | 13 OR 14                                                                                                                                                                                                                                                                                         |
| 16.                                           | exp "CYTOREDUCTION"/                                                                                                                                                                                                                                                                             |
| 17.                                           | (CYTOREDUCTION).ti,ab                                                                                                                                                                                                                                                                            |
| 18.                                           | 16 OR 17                                                                                                                                                                                                                                                                                         |
| 19.                                           | (MORBIDITY).ti,ab                                                                                                                                                                                                                                                                                |
| 20.                                           | exp "MORBIDITY"/                                                                                                                                                                                                                                                                                 |
| 21.                                           | 19 OR 20                                                                                                                                                                                                                                                                                         |
| 22.                                           | (MORTALITY).ti,ab                                                                                                                                                                                                                                                                                |
| 23.                                           | exp "MORTALITY"/                                                                                                                                                                                                                                                                                 |
| 24.                                           | 22 OR 23                                                                                                                                                                                                                                                                                         |
| 25.                                           | 3 AND 6 AND 9 AND 12 AND 15 AND 18 AND 21 AND 24                                                                                                                                                                                                                                                 |

**Supplementary Table S2. Qualitative data synthesis of studies reporting overall survival, cytoreduction rates and 30 day major post-operative morbidity and mortality following recurrence surgery in platinum sensitive epithelial ovarian carcinoma**

| Author                  | Year | Design               | FU (months) | Sample size (N) | Deaths (N) | Mean Age | Median OS | DF I | Solitary metastasis (%) | Optimal cytoreduction criteria | Optimal cytoreduction (%) | Complete cytoreduction (%) | Post operative morbidity (%) | Post operative mortality (%) | Bev/ PARP | HIPEC |
|-------------------------|------|----------------------|-------------|-----------------|------------|----------|-----------|------|-------------------------|--------------------------------|---------------------------|----------------------------|------------------------------|------------------------------|-----------|-------|
| SECONDARY CYTOREDUCTION |      |                      |             |                 |            |          |           |      |                         |                                |                           |                            |                              |                              |           |       |
| Morris                  | 1989 | Retrospective cohort |             | 30              |            |          | 16.3      | 42.5 |                         | <2                             | 56.7                      | 30                         | 36.7                         | 0                            |           |       |
| Janicke                 | 1992 | Retrospective cohort |             | 30              |            | 53       | 18        | 16   |                         | <2                             | 86.7                      | 46.7                       | 23.3                         | 0                            |           |       |
| Segna                   | 1993 | Retrospective cohort |             | 100             |            |          | 16.6      |      |                         | <2                             | 61                        |                            | 13                           | 1                            |           |       |
| Eisenkop                | 1995 | Prospective cohort   |             | 36              | 13         | 60.6     | 43        | 22   | 13.9                    | ≤1                             | 91.7                      | 83.3                       | 30.1                         | 2.8                          |           |       |
| Landoni                 | 1998 | Retrospective cohort |             | 38              | 16         |          | 29        | 22   |                         | no macroscopic disease         | 100                       | 100                        | 37                           | 5                            |           |       |
| Lichtenegger            | 1998 | Retrospective cohort |             | 63              |            | 58       | 23        |      |                         | <2                             | 65                        | 22                         | 25.9                         | 6                            |           |       |
| Cormio                  | 1999 | Retrospective cohort | 39 (6-96)   | 21              | 4          | 58       | 29        | 25   |                         | <2                             |                           | 71.4                       | 42.9                         | 0                            |           |       |
| Chen                    | 2000 | Retrospective cohort | 17          | 22              | 9          | 56.5     | 41        | 14   |                         | <1                             | 86.4                      | 63.6                       | 28.6                         | 0                            |           |       |
| Eisenkop                | 2000 | Prospective cohort   |             | 106             | 42         | 60.5     | 34.4      | 16.8 | 17.9                    | <0.5                           | 84.9                      | 82.1                       | 32.1                         | 1.9                          |           |       |
| Gadducci                | 2000 | Retrospective cohort |             | 30              | 19         | 58.5     | 21        | 17.5 | 36.7                    | <2                             | 83.3                      | 56.7                       | 20                           | 3.3                          |           |       |

|          |      |                      |                  |     |    |      |      |      |      |                        |      |      |      |     |  |    |
|----------|------|----------------------|------------------|-----|----|------|------|------|------|------------------------|------|------|------|-----|--|----|
| Tay      | 2002 | Retrospective cohort | 88               | 46  |    | 50.3 | 22.5 | 26   |      | $\leq 1$               | 71.7 | 41.3 | 10   | 2.2 |  |    |
| Loizzi   | 2003 | Retrospective cohort | 63 (23-250)      | 31  |    | 54   | 21   |      |      | $< 2$                  | 96.4 |      |      |     |  |    |
| Look     | 2003 | Prospective cohort   | 26.9 (0.5-79.1)  | 28  | 18 | 54   | 45.8 |      |      | $< 2.5$                | 75   | 57.1 | 10.7 | 0   |  | ** |
| Meredith | 2003 | Retrospective cohort | 33.2 (3.6-49.6)  | 26  | 18 | 62   | 26.3 |      |      | $\leq 1$               | 80.8 | 69.2 | 23.1 | 0   |  |    |
| Yoon     | 2003 | Retrospective cohort | 39               | 24  | 10 | 53   | 62   | 36.5 |      | $\leq 1$               | 100  | 87.5 | 20.8 | 0   |  |    |
| Uzan     | 2004 | Retrospective cohort | 50 (12-158)      | 12  | 3  | 51   |      | 21   |      | no macroscopic disease | 100  | 100  | 25   | 0   |  |    |
| Zang     | 2004 | Prospective cohort   | 16 (5-84)        | 117 | 72 | 53   | 22   | 15.4 | 28.2 | $\leq 1$               | 61.5 | 9.4  | 7.7  | 0   |  |    |
| Zanon    | 2004 | Prospective cohort   | 18.9 (2-68.2)    | 30  |    | 60   | 28.1 |      |      | $\leq 0.25$            | 76.7 |      | 16.7 | 3.3 |  | ** |
| Gronlund | 2005 | Retrospective cohort | 61.6 (20.1-71.4) | 38  | 28 |      |      | 16.3 | 31.6 | no macroscopic disease | 65.8 | 42.1 | 5.3  | 0   |  |    |
| Gungor   | 2005 | Retrospective cohort |                  | 44  |    | 54.3 | 16   | 27.1 | 63.6 | $< 1$                  |      | 77.3 | 9    | 0   |  |    |
| Onda     | 2005 | Retrospective cohort | 60 (17-199)      | 44  |    | 52   | 32   | 18.5 | 36.4 | $< 1$                  | 84.1 | 59.1 |      | 0   |  |    |
| Yap      | 2005 | Retrospective cohort | 24 (6-128)       | 22  | 13 | 57.4 | 26   | 48.2 | 59   | $< 0.5$                | 100  |      | 22.7 | 0   |  |    |
| Ayhan    | 2006 | Retrospective cohort | 33.7             | 64  |    | 50.6 | 18.6 | 15.5 | 20.2 | $\leq 1$               | 82.8 | 43.8 |      |     |  |    |

|                  |      |                      |                   |     |     |      |      |      |      |            |      |      |      |     |  |    |
|------------------|------|----------------------|-------------------|-----|-----|------|------|------|------|------------|------|------|------|-----|--|----|
| Chi              | 2006 | Retrospective cohort | 36.9 (0.16-125.6) | 153 | 105 | 56.5 | 41.7 | 17   |      | $\leq 0.5$ | 51.6 | 40.5 | 3.9  | 0   |  |    |
| Harter           | 2006 | Retrospective cohort | 19                | 267 |     | 60   | 29.2 |      |      | $\leq 1$   | 75.7 | 49.8 |      |     |  |    |
| Manci            | 2006 | Retrospective cohort | 30                | 24  | 7   | 54   | 56   | 26   | 37.5 | $\leq 0.5$ | 100  |      | 12.5 | 0   |  |    |
| Matsumoto        | 2006 | Retrospective cohort |                   | 23  | 14  | 55.7 | 41.7 | 22.5 | 43.5 | $< 2$      | 43.5 | 30.4 | 4.3  | 0   |  |    |
| Park             | 2006 | Retrospective cohort |                   | 14  |     | 53   | 32   | 17   |      | $\leq 0.5$ | 64.3 | 42.9 | 35.7 | 0   |  |    |
| Rufian           | 2006 | Prospective cohort   |                   | 14  |     | 53   | 57   |      |      | $\leq 1$   |      |      | 14.3 | 0   |  | ** |
| Benedetti Panici | 2007 | Prospective cohort   |                   | 47  | 18  | 52   | 49   | 15   | 59.6 | $\leq 1$   | 87.2 | 78.7 | 19.1 | 0   |  |    |
| Cotte            | 2007 | Prospective cohort   | 47.1 (9-203.7)    | 81  | 39  | 54.3 | 28.4 |      |      | $\leq 0.5$ | 80.2 | 55.6 | 13.6 | 2.5 |  | ** |
| Salani           | 2007 | Retrospective cohort | 30                | 55  |     | 57.7 | 48   |      |      | $\leq 1$   | 89.1 | 74.5 | 25.5 | 1.8 |  |    |
| Santillan        | 2007 | Retrospective cohort | 19 (7-37)         | 25  | 8   | 59   | 37   | 16   |      | $\leq 1$   | 100  | 96   | 0    | 0   |  |    |
| Bae              | 2009 | Retrospective cohort | 31 (1-77)         | 54  |     | 54   | 42   | 24   | 22.2 | $< 0.5$    | 87   | 59.3 | 20.4 | 0   |  |    |
| Bristow          | 2009 | Retrospective cohort |                   | 56  |     | 56   | 38.4 |      |      | $\leq 1$   | 92.9 | 85.7 | 23.2 | 1.8 |  |    |
| Cheng            | 2009 | Retrospective cohort |                   | 21  |     | 53   | 10   |      |      | $\leq 1$   | 33   |      |      |     |  |    |
| Fotiou           | 2009 | Retrospective cohort | 45                | 21  | 5   | 52   | 47   | 21   |      | $\leq 1$   | 90.5 | 81   | 0    |     |  |    |
| Harter           | 2009 | Retrospective cohort |                   | 250 |     | 60   | 29.5 |      |      | $\leq 1$   | 76.4 | 50   | 13.6 | 0   |  |    |
| Park             | 2010 | Retrospective cohort | 41 (6-145)        | 67  | 30  | 55   | 36   | 20   |      | $\leq 1$   | 61.2 | 55.2 | 16.4 | 0   |  |    |

|             |      |                      |                  |     |     |      |      |      |      |                        |      |      |      |     |  |    |
|-------------|------|----------------------|------------------|-----|-----|------|------|------|------|------------------------|------|------|------|-----|--|----|
| Schorge     | 2010 | Retrospective cohort | 31 (5-137)       | 40  | 17  | 55.5 | 54   | 28   | 52.5 | $\leq 0.5$             | 80   | 55   |      | 2.5 |  |    |
| Tian        | 2010 | Retrospective cohort | 26.1 (5.9-80)    | 123 | 63  | 51   | 31.7 | 16.1 | 39.8 | $\leq 1$               | 78.9 | 41.5 | 4.1  | 0   |  |    |
| Woelber     | 2010 | Retrospective cohort | 13 (1-100)       | 48  | 26  | 60   | 26   | 18   |      | $< 1$                  | 47.9 | 33.3 | 44   | 2.1 |  |    |
| Burton      | 2011 | Retrospective cohort |                  | 20  |     | 59   | 22.5 | 18   |      | no macroscopic disease | 80   | 55   |      |     |  |    |
| Fagotti     | 2011 | Prospective cohort   |                  | 41  |     | 52.6 | 38   | 19   |      | $< 0.25$               | 100  | 95.3 | 35   | 0   |  | ** |
| Frederick   | 2011 | Retrospective cohort | 34.4 (0.8-261.6) | 62  |     |      | 71.1 | 28.2 |      | $< 1$                  | 76.3 | 36   | 8.1  |     |  |    |
| Goto        | 2011 | Retrospective cohort | 44 (13-155)      | 34  |     | 57   | 60   | 10   | 65   | $\leq 1$               |      | 74   |      |     |  |    |
| Konosrainer | 2011 | Retrospective cohort | 63 (13-170)      | 31  | 10  | 60   |      | 25.1 |      | $< 0.25$               | 90.3 | 64.5 |      | 0   |  | ** |
| Celeen      | 2012 | Prospective cohort   | 20.8             | 42  |     | 52   | 37   | 3    |      |                        |      | 50   | 21   | 0   |  | ** |
| Nasu        | 2014 | Retrospective cohort | 79.5             | 16  |     | 57.5 | 48.9 | 26.5 |      | $\leq 1$               | 95.5 | 86.4 |      |     |  |    |
| Lee         | 2015 | Retrospective cohort | 48 (0-68.4)      | 187 |     | 59   | 49.9 |      |      | $< 0.5$                | 92.5 | 74.9 |      |     |  |    |
| Minaguchi   | 2016 | Retrospective cohort | 53 (12-195)      | 80  |     | 53.5 | 46   |      | 48.8 | $< 1$                  | 86.3 | 60   |      |     |  |    |
| Petrillo    | 2016 | Retrospective cohort |                  | 70  | 34  |      | 62   |      | 21.4 | $< 0.25$               | 100  | 88.6 | 35.7 |     |  | ** |
| Van         | 2016 | Retrospective cohort | 29 (0-168)       | 408 | 200 | 61   | 51   | 28   | 58.1 | $< 0$                  | 99.3 | 72.3 | 20.1 | 1.7 |  |    |

| Cowan                  | 2017 | Retrospective cohort | 39 (0.4-147.9)   | 214             | 70         | 58.5 | 82.2         |      | 42.5          | no macroscopic disease  | 86.4                           | 86.4                      |                            | 0                           |                             |          |       |
|------------------------|------|----------------------|------------------|-----------------|------------|------|--------------|------|---------------|-------------------------|--------------------------------|---------------------------|----------------------------|-----------------------------|-----------------------------|----------|-------|
| Fan                    | 2017 | Retrospective cohort | 32.1 (2-128)     | 103             | 71         |      | 60           |      | 27.2          | ≤1                      | 78.6                           | 54.3                      |                            |                             |                             |          |       |
| Felsinger              | 2018 | Retrospective cohort |                  | 30              | 14         | 64   |              |      | 73.3          | <0.25                   | 93.3                           | 80                        | 0                          | 0                           |                             |          |       |
| Gallotta               | 2018 | Retrospective cohort | 24 (9-71)        | 58              | 5          | 53   |              | 20   |               | no macroscopic disease  | 100                            | 100                       | 10.3                       |                             |                             | **       |       |
| Coleman                | 2019 | RCT                  |                  | 240             | 105        |      | 50.6         | 18.9 | 36.3          |                         |                                | 67                        | 8.9                        | 0.4                         | *                           |          |       |
| Gockley                | 2019 | Retrospective cohort |                  | 146             | 42         |      | 54           |      |               | <1                      | 70                             | 42.5                      |                            |                             |                             |          |       |
| So                     | 2019 | Retrospective cohort | 60.2             | 22              |            | 63.5 | 91.4         |      | 2.7           |                         |                                | 72.7                      |                            |                             | *                           |          |       |
| Harter                 | 2021 | RCT                  | 69.8 (59.8-80.4) | 206             | 120        | 60.8 | 53.7         | 18.4 |               | ≤1                      | 79.6                           | 70.4                      |                            | 0                           | *<br>+                      |          |       |
| Raj                    | 2021 | Prospective cohort   |                  | 15              | 2          | 51   | 26 (22.9-29) |      |               |                         |                                |                           | 47                         |                             |                             | **       |       |
| Shi                    | 2021 | RCT                  | 36 (18-60.6)     | 182             |            |      | 58.1         | 17.4 |               |                         |                                | 76.7                      | 22.7                       | 0                           | *<br>+                      |          |       |
| Zivanovic              | 2021 | RCT                  | 39.5             | 98              | 37         | 59   |              | 16   | 13.3          | ≤0.5                    | 100                            | 87.8                      |                            |                             |                             | **       |       |
| TERTIARY CYTOREDUCTION |      |                      |                  |                 |            |      |              |      |               |                         |                                |                           |                            |                             |                             |          |       |
| Author                 | Year | Study design         | FU (months)      | Sample size (N) | Deaths (N) | Age  | Median OS    |      | TFI from SC R | Solitary metastasis (%) | Optimal cytoreduction criteria | Optimal cytoreduction (%) | Complete cytoreduction (%) | Postoperative morbidity (%) | Postoperative mortality (%) | Bev/PARP | HIPEC |
|                        |      |                      |                  |                 |            |      | A            | B    |               |                         |                                |                           |                            |                             |                             |          |       |

| Leitao                   | 2004 | Retrospective cohort | 22.3 (0-71.7)    | 26              | 17         | 55.5 | 36.3      | 10.6 | 13.4          | 42.3                    | ≤0.5                           | 73                        | 53.8                       |                             |                             |          |       |
|--------------------------|------|----------------------|------------------|-----------------|------------|------|-----------|------|---------------|-------------------------|--------------------------------|---------------------------|----------------------------|-----------------------------|-----------------------------|----------|-------|
| Karam                    | 2007 | Retrospective cohort |                  | 47              |            | 58   | 24        | 16   | 17            |                         | <1                             | 81                        | 64                         | 26                          | 0                           |          |       |
| Gultekin                 | 2008 | Retrospective cohort | 15 (1-87)        | 20              | 7          | 51   | 32        | 6    | 4             | 50                      | <2                             | 60                        | 35                         | 15                          | 0                           |          |       |
| Shih                     | 2010 | Retrospective cohort | 28.9 (0.7-123.7) | 77              | 38         | 56.1 | 55.9      | 13.6 | 17            | 37.7                    | ≤0.5                           | 88.3                      | 72.7                       | 26                          | 0                           |          |       |
| Hizli                    | 2012 | Retrospective cohort | 13 (1-53)        | 23              |            | 58   |           |      | 18            | 17.4                    | <1                             | 65.2                      |                            | 13                          | 0                           |          |       |
| Fotopoulos               | 2013 | Retrospective cohort | 14 (0-182)       | 406             | 211        | 55   | 49        | 12   |               |                         |                                |                           | 54.1                       | 25.9                        | 3.2                         |          |       |
| Fanfani                  | 2015 | Retrospective cohort |                  | 46              |            |      | 99        | 79   | 22            | 90.6                    |                                | 91.3                      | 77.5                       |                             |                             |          |       |
| Manning-Geist            | 2021 | Retrospective cohort | 35.4 (0.2-272.9) | 114             | 58         | 57.5 | 60.3      | 27.5 | 16.1          | 52.3                    | ≤1                             | 89.5                      | 89.5                       | 33.3                        | 0                           | *        | +     |
| QUATERNARY CYTOREDUCTION |      |                      |                  |                 |            |      |           |      |               |                         |                                |                           |                            |                             |                             |          |       |
| Author                   | Year | Study design         | FU (months)      | Sample size (N) | Deaths (N) | Age  | Median OS |      | TFI from TC R | Solitary metastasis (%) | Optimal cytoreduction criteria | Optimal cytoreduction (%) | Complete cytoreduction (%) | Postoperative morbidity (%) | Postoperative mortality (%) | Bev/PARP | HIPEC |
|                          |      |                      |                  |                 |            |      | A         | B    |               |                         |                                |                           |                            |                             |                             |          |       |
| Fotopoulos               | 2013 | Retrospective cohort | 18.41            | 49              | 38         | 57   | 43        | 13.4 |               |                         | ≤0.5                           | 63.2                      | 32.6                       | 28.6                        | 2                           |          |       |
| Bacalbaşa                | 2015 | Retrospective cohort |                  | 20              |            | 54.3 | 55        |      |               |                         | <1                             | 55                        | 35                         | 15                          | 0                           |          |       |
| Fanfani                  | 2015 | Retrospective cohort |                  | 12              |            |      | 135       |      | 20            |                         |                                | 100                       | 100                        |                             |                             |          |       |
| Manning-Geist            | 2021 | Retrospective cohort |                  | 20              | 10         | 61.1 | 39.4      | 9.5  | 14.1          | 44.7                    |                                |                           | 85                         |                             | 0                           | *        | +     |

OS – overall survival (defined as survival from date of recurrence surgery to death); DFI – disease free interval (defined as time after the primary treatment until first recurrence); TFI – treatment free interval (defined as time without any treatment after secondary/tertiary cytoreduction surgery until second/third recurrence); SCR – secondary cytoreductive surgery (defined as cytoreduction surgery after first recurrence of platinum sensitive epithelial ovarian carcinoma); TCR – tertiary cytoreductive surgery (defined as cytoreduction surgery after second recurrence of platinum sensitive epithelial ovarian carcinoma); Bev – bevacizumab; PARP - poly ADP ribose polymerase inhibitor; major post-operative morbidity defined as Clavien Dindo grade III and IV complication.

\*Studies reporting use of bevacizumab/olaparib

+ studies reporting use of PARP inhibitor

A optimal cytoreduction

B suboptimal cytoreduction

†overall survival



**Supplementary Table S3. Risk of bias assessment**

| Newcastle Ottawa Score (risk of bias) |              |               |                  |
|---------------------------------------|--------------|---------------|------------------|
| Studies                               | Selection    | Comparability | Outcome/Exposure |
| SECONDARY CYTOREDUCTION               |              |               |                  |
| Morris                                | Medium (***) | Medium (*)    | High (*)         |
| Janicke                               | Medium (***) | Medium (*)    | Medium (**)      |
| Segna                                 | Medium (***) | Medium (*)    | Medium (**)      |
| Eisenkop                              | Medium (***) | Medium (*)    | Low (***)        |
| Landoni                               | Medium (***) | Medium (*)    | Low (***)        |
| Lichtenegger                          | Medium (***) | Medium (*)    | Low (***)        |
| Cormio                                | Medium (***) | Medium (*)    | High (*)         |
| Chen                                  | Medium (***) | Medium (*)    | High (*)         |
| Eisenkop                              | Medium (***) | Medium (*)    | Medium (**)      |
| Gadducci                              | Medium (***) | Medium (*)    | Medium (**)      |
| Tay                                   | Medium (***) | Medium (*)    | Medium (**)      |
| Loizzi                                | Medium (***) | Medium (*)    | Low (***)        |
| Look                                  | Medium (***) | Medium (*)    | Medium (**)      |
| Meredith                              | Medium (***) | High (-)      | Medium (**)      |
| Yoon                                  | Medium (***) | High (-)      | Medium (**)      |
| Uzan                                  | Medium (***) | Medium (*)    | Medium (**)      |
| Zang                                  | Medium (***) | High (-)      | Medium (**)      |
| Zanon                                 | Medium (***) | High (-)      | Medium (**)      |
| Gronlund                              | Medium (***) | Medium (*)    | Medium (**)      |
| Gungor                                | Medium (***) | Medium (*)    | Low (***)        |
| Onda                                  | Medium (***) | Medium (*)    | Medium (**)      |
| Yap                                   | Medium (***) | Medium (*)    | Medium (**)      |

|                  |              |            |             |
|------------------|--------------|------------|-------------|
| Ayhan            | Medium (***) | Medium (*) | Medium (**) |
| Chi              | Medium (***) | Medium (*) | Low (***)   |
| Harter           | Medium (***) | High (-)   | Medium (**) |
| Manci            | Medium (***) | High (-)   | Medium (**) |
| Matsumoto        | Medium (***) | Medium (*) | Low (***)   |
| Park             | Medium (***) | Medium (*) | Low (***)   |
| Rufian           | Medium (***) | Medium (*) | Low (***)   |
| Benedetti Panici | Medium (***) | Medium (*) | Low (***)   |
| Cotte            | Medium (***) | High (-)   | Medium (**) |
| Salani           | Medium (***) | High (-)   | Medium (**) |
| Santillan        | Medium (***) | Medium (*) | Low (***)   |
| Bae              |              |            |             |
| Bristow          | Medium (***) | Medium (*) | Low (***)   |
| Cheng            | Medium (***) | Medium (*) | Low (***)   |
| Fotiou           | Medium (***) | Medium (*) | Low (***)   |
| Harter           | Medium (***) | High (-)   | Medium (**) |
| Park             | Medium (***) | Medium (*) | Medium (**) |
| Schorge          | Medium (***) | Medium (*) | Medium (**) |
| Tian             | Medium (***) | High (-)   | Medium (**) |
| Woelber          | Medium (***) | Medium (*) | Medium (**) |
| Burton           | Medium (***) | Medium (*) | Medium (**) |
| Fagotti          | Medium (***) | Medium (*) | Low (***)   |
| Frederick        | Medium (***) | Medium (*) | Low (***)   |
| Goto             | Medium (***) | Medium (*) | Low (***)   |
| Konosrainer      | Medium (***) | Medium (*) | Low (***)   |

|                                 |              |            |             |
|---------------------------------|--------------|------------|-------------|
| Celeen                          | Medium (***) | Medium (*) | Medium (**) |
| Nasu                            | Medium (***) | Medium (*) | Medium (**) |
| Lee                             | Medium (***) | Medium (*) | Medium (**) |
| Minaguchi                       | Low (****)   | Low (**)   | Medium (**) |
| Petrillo                        | Medium (***) | Medium (*) | Medium (**) |
| Van                             | Medium (***) | Medium (*) | Medium (**) |
| Cowan                           | Medium (***) | Low (**)   | Medium (**) |
| Fan                             | Medium (***) | Medium (*) | Low (***)   |
| Felsingner                      | Medium (***) | Medium (*) | Medium (**) |
| Gallotta                        | Low (****)   | Medium (*) | Medium (**) |
| Coleman                         | Medium (***) | Medium (*) | Low (***)   |
| Gockley                         | Medium (***) | Medium (*) | Low (***)   |
| So                              | Medium (***) | Medium (*) | Low (***)   |
| Harter                          | Low (****)   | Low (**)   | Low (***)   |
| Raj                             | Medium (***) | Medium (*) | Low (***)   |
| Shi                             | Low (****)   | Low (**)   | Low (***)   |
| Zivanovic                       | Low (****)   | Low (**)   | Low (***)   |
| <b>TERTIARY CYTOREDUCTION</b>   |              |            |             |
| Leitao                          | Medium (***) | Medium (*) | Medium (**) |
| Karam                           | Medium (***) | Medium (*) | Medium (**) |
| Gultekin                        | Medium (***) | High (-)   | High (-)    |
| Shih                            | Medium (***) | Medium (*) | Medium (**) |
| Hizli                           | Medium (***) | High (-)   | Medium (**) |
| Fotopoulou                      | High (*)     | High (-)   | High (*)    |
| Fanfani                         | Medium (***) | Medium (*) | Medium (**) |
| Manning-Geist                   | Medium (***) | Medium (*) | Medium (**) |
| <b>QUATERNARY CYTOREDUCTION</b> |              |            |             |
| Fotopoulou                      | Medium (***) | Medium (*) | Medium (**) |
| Bacalbaşa                       | High (*)     | High (-)   | Medium (**) |
| Fanfani                         | High (*)     | Medium (*) | Medium (**) |

|               |          |          |          |
|---------------|----------|----------|----------|
| Manning-Geist | High (*) | High (-) | High (*) |
|---------------|----------|----------|----------|

Low risk of bias: studies that scored four stars for selection, two stars for comparability, and three stars for ascertainment of the outcome/exposure.

Medium risk of bias: studies that scored two to three stars for selection, one for comparability, and two for outcome/exposure ascertainment.

High risk of bias: studies that scored one or zero for selection, zero for comparability, one or zero for outcome/exposure ascertainment.

**Supplementary Table S4: GRADE assessment of certainty of evidence per outcome**

| Outcome                          | Number of studies | Certainty of evidence (GRADE) |
|----------------------------------|-------------------|-------------------------------|
| Secondary cytoreduction surgery  | 64                | High*                         |
| Tertiary cytoreduction surgery   | 8                 | Moderate**                    |
| Quaternary cytoreduction surgery | 4                 | Moderate**                    |

GRADE - Grading of Recommendations, Assessment, Development and Evaluations

\*Majority of studies were observational studies, which have an initial low level of evidence. Certainty of evidence was upgraded due to large and consistent size effects and presence of randomised control trial data.

\*\*All included studies were observational studies, which have an initial low level of evidence. Certainty of evidence was downgraded due to serious risks of bias. However, certainty of evidence was upgraded taking into account consistent size effect.
